# Supplementary material
Source: HighWire-hosted journal article supplement (https://bmjopen.bmj.com/content/13/3/e070822)
Supplement: inline-supplementary-material-2 [file inline-supplementary-material-2.pdf]

**Supplementary Table 2: Linear regression models of the associations between pre-stroke PASE quartiles, other baseline parameters and mean MDI-score differences one and six months after stroke. A sensitivity analysis without patients requiring open-label antidepressant therapy**

|                               | One month MDI scores      |              |                           |              | Six month MDI scores      |              |                           |              |
|-------------------------------|---------------------------|--------------|---------------------------|--------------|---------------------------|--------------|---------------------------|--------------|
|                               | Unadjusted                |              | Adjusted*                 |              | Unadjusted                |              | Adjusted*                 |              |
|                               | Mean differences (95% CI) | p-value      |
| <b>Pre-stroke PASE score†</b> |                           |              |                           |              |                           |              |                           |              |
| 1 <sup>st</sup> quartile      | Ref                       | -            | Ref                       | -            | Ref                       | -            | Ref                       | -            |
| 2 <sup>nd</sup> quartile      | -0.6 (-2.7, 1.5)          | 0.566        | -0.1 (-2.2, 2.1)          | 0.954        | -1.4 (-3.7, 0.9)          | 0.220        | -1.2 (-3.5, 1.2)          | 0.335        |
| 3 <sup>rd</sup> quartile      | -1.9 (-3.8, -0.1)         | <b>0.043</b> | -2.0 (-3.8, -0.2)         | <b>0.034</b> | -2.8 (-4.9, -0.8)         | <b>0.008</b> | -3.0 (-5.1, -0.9)         | <b>0.006</b> |
| 4 <sup>th</sup> quartile      | -2.8 (-4.4, -1.1)         | <b>0.001</b> | -2.1 (-4.0, -0.2)         | <b>0.029</b> | -2.7 (-4.9, -0.6)         | <b>0.014</b> | -2.4 (-4.8, -0.03)        | <b>0.048</b> |
| <b>Study treatment</b>        |                           |              |                           |              |                           |              |                           |              |
| Placebo                       | Ref                       | -            | Ref                       | -            | Ref                       | -            | Ref                       | -            |
| Citalopram                    | 0.7 (-0.6, 2.1)           | 0.264        | 1.1 (-0.2, 2.4)           | 0.112        | -0.6 (-2.0, 0.8)          | 0.419        | -0.4 (-1.8, 1.0)          | 0.558        |
| <b>Sex</b>                    |                           |              |                           |              |                           |              |                           |              |
| Male                          | Ref                       | -            | Ref                       | -            | Ref                       | -            | Ref                       | -            |
| Female                        | 1.3 (-0.1, 2.7)           | 0.065        | 1.7 (0.2, 3.2)            | <b>0.022</b> | 2.4 (0.8, 4.0)            | <b>0.003</b> | 2.1 (0.4, 3.9)            | <b>0.014</b> |
| Age, per year increase        | -0.001 (-0.1, 0.1)        | 0.964        | -0.1 (-0.1, 0.01)         | 0.071        | 0.01 (-0.1, 0.1)          | 0.874        | -0.1 (-0.1, 0.01)         | 0.105        |
| <b>Cohabitation status</b>    |                           |              |                           |              |                           |              |                           |              |
| Living alone                  | Ref                       | -            | Ref                       | -            | Ref                       | -            | Ref                       | -            |
| Cohabitant                    | -0.01 (-1.4, 1.4)         | 0.986        | 0.3 (-1.2, 1.7)           | 0.705        | -1.3 (-2.9, 0.3)          | 0.103        | -0.7 (-2.4, 0.9)          | 0.364        |
| <b>Smoking status</b>         |                           |              |                           |              |                           |              |                           |              |
| Never smoker                  | Ref                       | -            | Ref                       | -            | Ref                       | -            | Ref                       | -            |
| History of smoking            | -1.0 (-2.3, 0.4)          | 0.171        | -0.9 (-2.2, 0.4)          | 0.175        | -0.1 (-1.6, 1.4)          | 0.892        | 0.2 (-1.3, 1.7)           | 0.812        |

|                                                  |                  |       |                  |       |                   |                  |                   |                  |
|--------------------------------------------------|------------------|-------|------------------|-------|-------------------|------------------|-------------------|------------------|
| <b>Medical history‡</b>                          |                  |       |                  |       |                   |                  |                   |                  |
| <b>Diabetes</b>                                  | 0.7 (-1.3, 2.8)  | 0.470 | 0.8 (-1.2, 2.8)  | 0.434 | -0.7 (-2.6, 1.3)  | 0.491            | -1.1 (-3.0, 0.9)  | 0.271            |
| <b>Hypertension</b>                              | 1.5 (0.2, 2.8)   | 0.026 | 0.7 (-0.6, 2.1)  | 0.273 | 1.3 (-0.1, 2.7)   | 0.060            | 0.8 (-0.7, 2.3)   | 0.310            |
| <b>Atrial fibrillation</b>                       | -1.2 (-2.8, 0.5) | 0.168 | -1.0 (-2.6, 0.6) | 0.215 | -0.3 (-2.2, 1.7)  | 0.792            | -0.8 (-2.7, 1.1)  | 0.395            |
| <b>Previous MI</b>                               | 2.5 (-0.5, 5.6)  | 0.107 | 2.0 (-1.1, 5.1)  | 0.200 | 1.0 (-1.6, 3.7)   | 0.441            | 2.4 (-0.6, 5.3)   | 0.121            |
| <b>Previous TIA</b>                              | 2.4 (-4.0, 8.7)  | 0.464 | 2.2 (-4.0, 8.5)  | 0.484 | -4.2 (-6.2, -2.3) | <b>&lt;0.001</b> | -4.3 (-6.4, -2.2) | <b>&lt;0.001</b> |
| <b>PVD</b>                                       | 3.5 (-1.3, 8.3)  | 0.151 | 4.3 (-1.2, 9.8)  | 0.128 | 1.8 (-1.8, 5.4)   | 0.335            | 1.6 (-2.5, 5.6)   | 0.455            |
| <b>Admission NIHSS score, per point increase</b> | 0.1 (-0.04, 0.2) | 0.168 | 0.1 (-0.03, 0.3) | 0.106 | 0.2 (0.03, 0.4)   | <b>0.023</b>     | 0.2 (-0.01, 0.4)  | 0.064            |
| <b>Reperfusion treatment</b>                     |                  |       |                  |       |                   |                  |                   |                  |
| <b>No</b>                                        | Ref              | -     | Ref              | -     | Ref               | -                | Ref               | -                |
| <b>Yes</b>                                       | -0.1 (-1.4, 1.2) | 0.874 | -0.2 (-1.7, 1.2) | 0.731 | 0.1 (-1.3, 1.6)   | 0.860            | -0.2 (-1.7, 1.2)  | 0.746            |

MDI: Major depression inventory, CI: confidence interval, PASE: Physical Activity Scale for the Elderly, MI: myocardial infarction, TIA: transient ischemic attack, PVD: peripheral vascular disease, NIHSS: National Institute of Health Stroke Scale

\* Adjusted for citalopram treatment, sex, age, cohabitation, history of smoking, diabetes, hypertension, atrial fibrillation, myocardial infarction, transient ischemic attack, peripheral vascular disease, admission NIHSS score, and reperfusion treatment

† All pre-stroke PASE score quartiles are compared to the highest quartile (1<sup>st</sup> quartile)

‡ For all medical history variables the reference groups are patients who do not have the condition
