# Supplementary material
Source: HighWire-hosted journal article supplement (https://bmjopen.bmj.com/content/13/3/e070822)
Supplement: inline-supplementary-material-4 [file inline-supplementary-material-4.pdf]

**Supplementary Table 4: Linear regression models of the association between pre-stroke PASE quartiles, other baseline parameters and admission NIHSS score.**

|                                | Unadjusted                |              | Adjusted*                 |              |
|--------------------------------|---------------------------|--------------|---------------------------|--------------|
|                                | Mean differences (95% CI) | p-value      | Mean differences (95% CI) | p-value      |
| <b>Pre-stroke PASE score†</b>  |                           |              |                           |              |
| <b>1<sup>st</sup> quartile</b> | Ref                       | -            | Ref                       | -            |
| <b>2<sup>nd</sup> quartile</b> | -0.4 (-1.6, 0.8)          | 0.544        | -0.2 (-1.5, 1.0)          | 0.701        |
| <b>3<sup>rd</sup> quartile</b> | -0.5 (-1.7, 0.7)          | 0.434        | -0.2 (-1.5, 1.1)          | 0.769        |
| <b>4<sup>th</sup> quartile</b> | -1.6 (-2.7, -0.5)         | <b>0.006</b> | -1.3 (-2.6, -0.03)        | <b>0.045</b> |
| <b>Sex</b>                     |                           |              |                           |              |
| <b>Male</b>                    | Ref                       | -            | Ref                       | -            |
| <b>Female</b>                  | 1.3 (0.4, 2.2)            | <b>0.005</b> | 1.0 (0.03, 2.0)           | <b>0.043</b> |
| <b>Age, per year increase</b>  | 0.04 (0.004, 0.1)         | <b>0.029</b> | 0.01 (-0.03, 0.05)        | 0.534        |
| <b>Cohabitation status</b>     |                           |              |                           |              |
| <b>Living alone</b>            | Ref                       | -            | Ref                       | -            |
| <b>Cohabitant</b>              | 0.03 (-0.8, 0.9)          | 0.952        | 0.4 (-0.5, 1.3)           | 0.383        |
| <b>Smoking status</b>          |                           |              |                           |              |
| <b>Never smoker</b>            | Ref                       | -            | Ref                       | -            |
| <b>History of smoking</b>      | 0.3 (-0.6, 1.1)           | 0.557        | -0.01 (-0.9, 0.9)         | 0.991        |
| <b>Medical history‡</b>        |                           |              |                           |              |
| <b>Diabetes</b>                | -0.2 (-1.5, 1.0)          | 0.696        | 0.05 (-1.3, 1.4)          | 0.942        |
| <b>Hypertension</b>            | -0.5 (-1.3, 0.3)          | 0.234        | -0.9 (-1.8, -0.04)        | <b>0.041</b> |
| <b>Atrial fibrillation</b>     | 2.3 (1.0, 3.6)            | <b>0.001</b> | 2.1 (0.8, 3.5)            | <b>0.002</b> |
| <b>Previous MI</b>             | -0.03 (-1.5, 1.4)         | 0.965        | 0.4 (-1.1, 1.9)           | 0.605        |
| <b>Previous TIA</b>            | -1.7 (-2.9, -0.5)         | <b>0.005</b> | -1.5 (-2.5, -0.5)         | <b>0.002</b> |
| <b>PVD</b>                     | -0.1 (-2.1, 1.9)          | 0.940        | -1.5 (-3.4, 0.4)          | 0.127        |

NIHSS: National Institute of Health Stroke Scale, PASE: Physical Activity Scale for the Elderly, CI: confidence interval, MI: myocardial infarction, TIA: transient ischemic attack, PVD: peripheral vascular disease

\* Adjusted for sex, age, cohabitant status, history of smoking, diabetes, hypertension, atrial fibrillation, myocardial infarction, transient ischemic attack, and peripheral vascular disease

† All pre-stroke PASE score quartiles are compared to the highest quartile (1<sup>st</sup> quartile)

‡ For all medical history variables the reference groups are patients who do not have the condition
